# Supplementary material
Source: publisher site journal article supplement (https://www.dovepress.com/get_supplementary_file.php?f=256446.docx)
Supplement: Supplementary file 1 [file get_supplementary_file.php]

**Neuropsychiatrists’ understanding of conversion disorder survey**

1. How old are you?
   1. <30
   2. 31-40
   3. 41-50
   4. 51-60
   5. >61
2. What is your gender?
   1. Male
   2. Female
3. What specialty are you employed in?
   1. Liaison psychiatry
   2. Neuropsychiatry
   3. Other psychiatry
   4. Neurology
   5. Other physician
   6. I am not a medical doctor
4. How many years have you spent working in psychiatry?
5. How many months have you spend working in neurology?
6. Have you had any psychodynamic training, beyond the minimum college requirement (i.e. one ‘long case’)?
   1. Yes
   2. No
7. Approximately how many new patients with conversion disorder do you see in a year?
8. Briefly describe a memorable case, if you have time.
9. In which country did you principally train?
10. Do you think there are important differences in the clinical presentation of conversion disorder in different cultures?
    1. Yes
    2. No
11. Do you think there are substantial differences in how frequently conversion disorder presents in different cultures?
    1. Yes
    2. No
12. Do you think you have a sufficient model for conversion disorder in general?
    1. Yes
    2. No
13. Do you think with enough time and a compliant patient, a psychosocial explanation could be found for a case of conversion disorder?
    1. Never
    2. Rarely
    3. Often
    4. Usually
    5. Always
14. How often can you find a psychosocial explanation for a patient’s symptoms in practice?
    1. Never
    2. Rarely
    3. Often
    4. Usually
    5. Always
15. Do you see the aetiology of conversion disorder as involving (pick one):
    1. Disordered functioning of the nervous system
    2. Psychogenesis
    3. Disordered functioning of the nervous system plus psychogenesis
    4. Feigning
    5. Unknown or other
16. If a referring neurologist is sure that a patient has conversion disorder but you cannot explain their symptoms, would you make the diagnosis?
    1. Yes
    2. Depends on the neurologist
    3. No
17. If a referring neurologist is not sure of the diagnosis, but you can find and explanation, would you make the diagnosis?
    1. Yes
    2. Depends on the neurologist
    3. No
18. How often do you send conversion disorder referrals back to neurologists because you do not think the patient has a psychiatric disorder?
    1. Never
    2. Rarely
    3. Often
    4. Very often
19. How often do you diagnose a conversion disorder referral with a different psychiatric disorder instead?
    1. Never
    2. Rarely
    3. Often
    4. Very often
20. What role do psychiatrists have in the diagnosis of conversion disorder?
    1. Not helpful
    2. Helpful, but not essential
    3. Essential
21. Would you be confident in diagnosing a case of conversion disorder without assessment by a neurologist?
    1. Never
    2. Rarely
    3. Often
    4. Usually
    5. Always
22. Please choose the models you employ in understanding conversion disorder yourself (choose only those that you employ, ranked in terms of importance with 1 = most important).
    1. Abnormal illness behaviour
    2. Brain dysfunction
    3. Conversion
    4. Deception
    5. Dissociation
    6. Psychogenesis
    7. Self-deception
    8. Symptom amplification
    9. Symptom misinterpretation
    10. Anxiety or panic
    11. Reaction to stress
    12. Disturbed attention
    13. Other
        1. If you chose the “other” option in the previous question, please specify what model you employ.
23. Please choose the models you employ in explaining conversion disorder to patients (choose only those that you employ, ranked in terms of importance with 1 = most important).
    1. Abnormal illness behaviour
    2. Brain dysfunction
    3. Conversion
    4. Deception
    5. Dissociation
    6. Psychogenesis
    7. Self-deception
    8. Symptom amplification
    9. Symptom misinterpretation
    10. Anxiety or panic
    11. Reaction to stress
    12. Disturbed attention
    13. Other
        1. If you chose the “other” option in the previous question, please specify what model you employ.
24. Do you copy letters about your conversion patients to them?
    1. Never
    2. Rarely
    3. Often
    4. Usually
    5. Always
25. What proportion of your patients referred with unexplained neurological symptoms do you think are feigning?
    1. None
    2. A few
    3. Many
    4. Most or all of them
26. Which of the following best depicts the relationship between conversion and feigning in your opinion (1-4 from left to right)?


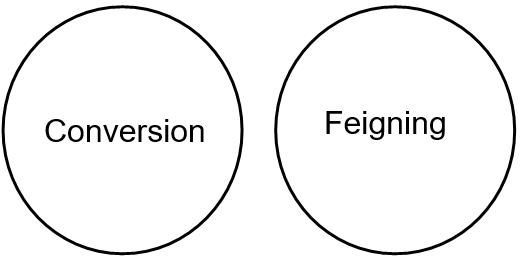

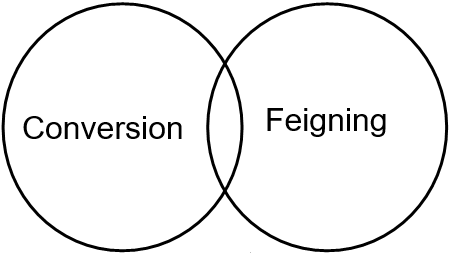

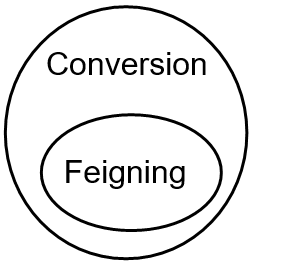

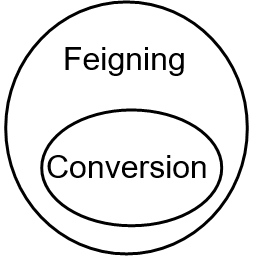


- 1. Option 1
  2. Option 2
  3. Option 3
  4. Option 4

1. Is it important to distinguish feigning from conversion disorder?
   1. Yes
   2. No
2. Do you talk about feigning with patients with unexplained neurology if you suspect it?
   1. Never
   2. Rarely
   3. Usually
   4. Always
3. Do you talk about feigning with patients with unexplained neurology if you are sure of it?
   1. Never
   2. Rarely
   3. Usually
   4. Always
4. Do you talk about feigning with patients with unexplained neurology when you do not suspect it?
   1. Never
   2. Rarely
   3. Usually
   4. Always
5. Who should address feigning in your patient? (choose all that apply)
   1. Me
   2. General practitioner
   3. Neurologist
   4. Police or some other agency
   5. No-one
6. Did you have exposure to conversion disorder, or a condition which you consider similar, prior to studying medicine?
   1. In myself
   2. A friend
   3. A family member
   4. No
      1. If you chose the ‘family member’ option in the previous question, please specify the relative.
7. What is your preferred term for use with colleagues? (choose only those that you use, ranked in terms of importance with 1 = most important)
   1. Conversion disorder
   2. Dissociative disorder
   3. Functional neurological disorder
   4. Medically unexplained
   5. Psychogenic disorder
   6. Other
      1. If you chose the “other” option in the previous question, please specify what term you use.
8. What is your preferred term for use with patients? (choose only those that you use, ranked in terms of importance with 1 = most important)
   1. Conversion disorder
   2. Dissociative disorder
   3. Functional neurological disorder
   4. Medically unexplained
   5. Psychogenic disorder
   6. Other
      1. If you chose the “other” option in the previous question, please specify what term you use.
9. What role do psychiatrists have in the management of conversion disorder?
   1. Not helpful
   2. Helpful, but not essential
   3. Essential
10. Have you ever treated anyone for conversion disorder who was:
    1. A Paralympian
    2. An aspiring Paralympian
    3. No
11. Do you understand conversion disorder to be neurological, in the same way that multiple sclerosis is neurological?
    1. Yes
    2. Not now, but I expect to one day
    3. No, and I expect I never will
